1 Manuscript title: Ambient nitrogen dioxide pollution and spread ability of  
2 COVID-19 in Chinese cities

3

4 Ye Yao<sup>†</sup>, Ph.D., Fudan University, Shanghai China

5 Jinhua Pan<sup>†</sup>, M.Sc., Fudan University, Shanghai China

6 Zhixi Liu<sup>†</sup>, B.Med., Fudan University, Shanghai China

7 Xia Meng<sup>†</sup>, Ph.D., Fudan University, Shanghai China

8 Weidong Wang, B.Med., Fudan University, Shanghai China

9 Haidong Kan<sup>\*</sup>, Ph.D. & M.D., Fudan University, Shanghai China

10 Weibing Wang<sup>\*</sup>, Ph.D. & M.D., Fudan University, Shanghai China

11

12 <sup>†</sup>Dr. Yao, Ms. Pan, Ms. Liu and Dr. Meng contributed equally to this letter.

13

14 <sup>\*</sup> Corresponding authors:

15 Dr. Weibing Wang, School of Public Health, Fudan University, Shanghai

16 200032, China, Email: [wwb@fudan.edu.cn](mailto:wwb@fudan.edu.cn)

- 1 Dr. Haidong Kan, School of Public Health, Fudan University, Shanghai 200032,
- 2 China, Email: [kanh@fudan.edu.cn](mailto:kanh@fudan.edu.cn)
- 3 Word account: 836

1           The Coronavirus (COVID-19) epidemic, which was first reported in  
2   December 2019 in Wuhan, China, has caused 219,331 confirmed cases as of 20  
3   March 2020, with 81,301 cases being reported in China. It has been declared a  
4   pandemic by the World Health Organization in 11 March 2020 (1). Although  
5   massive intervention measures have been implemented in China (e.g. shutting  
6   down cities, extending holidays and travel ban) and many other countries, the  
7   spread of the disease are unlikely to be stopped over the world shortly. It is  
8   becoming evident that environmental factors are associated with seasonality of  
9   respiratory-borne diseases' epidemics (2). Previous studies have suggested that  
10   ambient nitrogen dioxide (NO<sub>2</sub>) exposure may play a role in the phenotypes of  
11   respiratory diseases, including, but not limited to, influenza, asthma and severe  
12   acute respiratory syndrome (SARS). NO<sub>2</sub>), for example, might increase the  
13   susceptibility of adults to virus infections (3). High exposure to NO<sub>2</sub> before the  
14   start of a respiratory viral infection is associated with the severity of asthma  
15   exacerbation (4). This study aims to assess the associations of ambient NO<sub>2</sub>  
16   levels with spread ability of COVID-19 across 63 Chinese cities, and provides  
17   information for the further prevention and control of COVID-19.

18

## 19   Methods

20           We collected COVID-19 confirmed case information reported by the

1 National Health Commission and the Provincial Health Commissions of China.  
2 We calculated basic reproduction number ( $R_0$ ) for 63 cities with more than 50  
3 cases as of February 10 (COVID-19 peak time in China, including 12 cities in  
4 Hubei and 51 cities outside Hubei). The  $R_0$  means the expected number of  
5 secondary cases produced by an initial infectious individual, in a completely  
6 susceptible population. The calculation process is completed by R software.

7       Hourly  $\text{NO}_2$  data were obtained from the National Urban Air Quality  
8 Publishing Platform (<http://106.37.208.233:20035/>), which is administered by  
9 China's Ministry of Environmental Protection. Daily concentrations of  $\text{NO}_2$   
10 were calculated as the average of at least 18 (75%) hourly concentrations for all  
11 state-controlled stations, then daily  $\text{NO}_2$  levels of the city was averaged from all  
12 valid stations within it. Other meteorological data including daily mean  
13 temperature and relative humidity were collected from the China  
14 Meteorological Data Sharing Service System.

15       We conducted a cross-sectional analysis to examine the spatial associations  
16 of  $\text{NO}_2$  with  $R_0$  of COVID-19, and a longitudinal analysis to examine the  
17 temporal associations (day-by-day) of  $\text{NO}_2$  with  $R_0$  in the cities in Hubei  
18 province since they had enough confirmed case number to acquire stable daily  
19  $R_0$  and the other covariates including health policies were quite similar inside  
20 Hubei. We used multiple linear regression to assess the relationship between the  
21 spread ability of COVID-19 and  $\text{NO}_2$  pollution across the different cities.

1

## 2 Results

3 Among 63 cities, the mean  $\pm$  standard deviation and range were (27.9 $\pm$ 8.3,  
4 10.7-53.0) for NO<sub>2</sub> and (1.4 $\pm$ 0.3, 0.6-2.5) for R<sub>0</sub>. The top three cities (Wuhan,  
5 Huanggang and Yichang) with the highest R<sub>0</sub> were all in Hubei Province.

6 The cross-sectional analysis shows that, after adjustment for temperature  
7 and humidity, the R<sub>0</sub> was positively associated with NO<sub>2</sub> in all cities ( $\chi^2=10.18$ ,  
8  $p=0.037$ ). In a following stratified analysis, a significant association was  
9 confirmed in the cities outside of Hubei ( $r=0.29$ ,  $p=0.046$ ), while it is not the  
10 case in the cities inside Hubei ( $r=0.51$ ,  $p=0.130$ ) (**Figure 1**). We did not find  
11 significant associations of temperature and relative humidity with R<sub>0</sub> of  
12 COVID-19 ( $\chi^2=4.62$ ,  $p=0.372$  and  $\chi^2=1.63$ ,  $p=0.804$ ).

13 In temporal scale, we calculated daily R<sub>0</sub> of 11 cities in Hubei except Wuhan  
14 from January 27 to February 26 (there were few COVID-19 confirmed cases in  
15 these cities afterwards), and normalized them based on Wuhan's daily R<sub>0</sub> in  
16 order to avoid other covariates' effects. We found that the 11 Hubei cities  
17 (except Xianning City) all held significant positive correlations between NO<sub>2</sub>  
18 (with 12-day time lag) and R<sub>0</sub> ( $r>0.51$ ,  $p<0.005$ ), suggesting a positive  
19 association between NO<sub>2</sub> and COVID-19 spread ability in the temporal scale  
20 (**Figure 2**).

1

## 2 Discussion

3 Our study was designed to explore the association between the environment  
4 factors and the transmission of COVID-19. To our knowledge, this is the first  
5 study to investigate the ambient air pollution associated with the transmission of  
6 COVID-19. Our results reported the significant association between NO<sub>2</sub>  
7 exposure and R<sub>0</sub>, suggesting that ambient NO<sub>2</sub> may contribute to the spread  
8 ability of COVID-19. Previous studies have suggested that the increase spread  
9 ability from NO<sub>2</sub> might not be caused by increased susceptibility of the  
10 epithelial cells to infection but may result from effects of NO<sub>2</sub> on host defenses  
11 that prevent the spread of virus (5). Since NO<sub>2</sub> is a traffic-related air pollutant,  
12 the association may also be explained by the relationship between virus spread  
13 and population movement. Clearly, further investigations are warranted to  
14 provide additional details and illustrate the mechanism.

15 Our study has limitations. Given the ecological nature of study, other city-  
16 level factors, such as implementation ability of COVID-19 control policy,  
17 urbanization rate, and availability of medical resources, may affect the  
18 transmissibility of COVID-19 and confound our findings. Future studies should  
19 develop individual based models with high spatial-temporal resolution to assess  
20 the correlation between air pollution and epidemiologic characteristics of

1 COVID-19.

2

### 3 **Author contributions**

4 Ye Yao, Weibing Wang, and Haidong Kan designed the study. Jinhua Pan,  
5 Zhixi Liu, Ye Yao, and Weibing Wang collected COVID-19 incidence data and  
6 gained insight into the biology and natural history of the virus. Jinhua Pan,  
7 Zhixi Liu., Ye Yao and Weibing Wang developed the model and obtained the  
8 related parameters. Weidong Wang and Haidong Kan collected meteorological  
9 factors. Ye Yao, Jinhua Pan, Zhixi Liu, and Xia Meng drafted the manuscript.  
10 Haidong Kan and Weibing Wang revised the manuscript. All authors critically  
11 reviewed and approved the final version of the manuscript.

12

### 13 **Competing interests**

14 The authors declare no competing interests.

15

### 16 **Acknowledgements**

17 This study was sponsored by the Bill & Melinda Gates Foundation (Grant  
18 No. OPP1216424) and Fudan University Research Project on COVID-19  
19 Emergency (Grant No. IDF201007).

1

## 2 References

- 3 1. Toczek J, Wu J, Hillmer AT, Han J, Esterlis I, Cosgrove KP, Liu C, Sadeghi MM. Accuracy  
4 of arterial [(18)F]-Fluorodeoxyglucose uptake quantification: A kinetic modeling  
5 study. *J Nucl Cardiol* 2020.
- 6 2. Sooryanarain H, Elankumaran S. Environmental role in influenza virus outbreaks. *Annu*  
7 *Rev Anim Biosci* 2015; 3: 347-373.
- 8 3. Goings SA, Kulle TJ, Bascom R, Sauder LR, Green DJ, Hebel JR, Clements ML. Effect of  
9 nitrogen dioxide exposure on susceptibility to influenza A virus infection in healthy  
10 adults. 1989; 139: 1075-1081.
- 11 4. Chauhan AJ, Inskip HM, Linaker CH, Smith S, Holgate STJL. Personal exposure to  
12 nitrogen dioxide (NO<sub>2</sub>) and the severity of virus-induced asthma in children. 2003;  
13 361: 1939-1944.
- 14 5. Becker S, Soukup JM. Effect of nitrogen dioxide on respiratory viral infection in airway  
15 epithelial cells. *Environ Res* 1999; 81: 159-166.

16

17

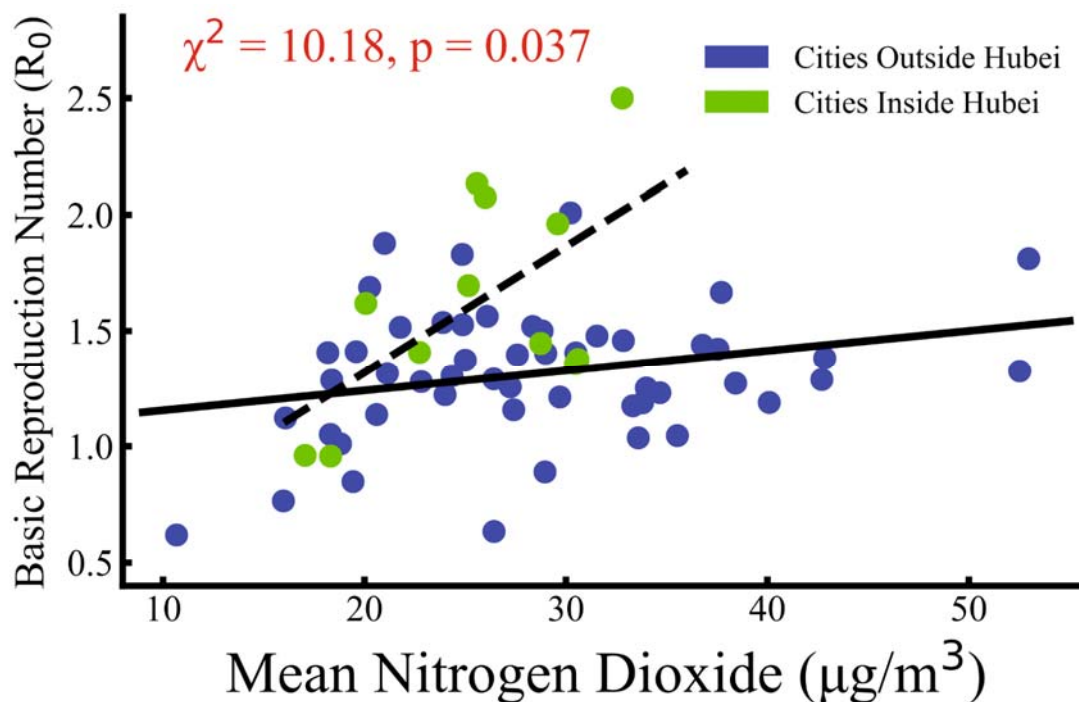

18



1 **Figure 1 Nitrogen Dioxide and Spread Ability of COVID-19 in Spatial Scale**

2 Basic Reproduction Number  $R_0$  was positively associated (Meta  $\chi^2=10.18$ ,  $p=0.037$ ) with  
3  $NO_2$  in cities outside Hubei (blue points, 51 cities,  $r=0.29$ ,  $p=0.046$ ) and cities inside Hubei  
4 (green points, 12 cities,  $r=0.51$ ,  $p=0.13$ ).

5 Temperature and humidity effects have been removed during statistical analysis.

6

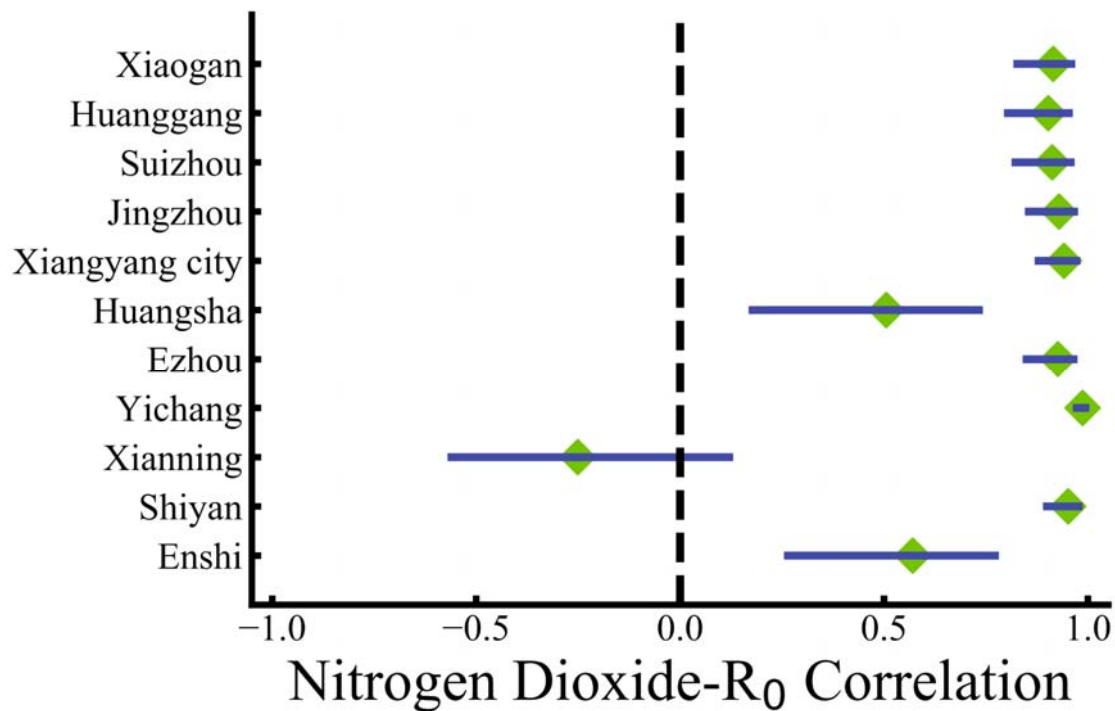

7

8 **Figure 2 Nitrogen Dioxide and Spread Ability of COVID-19 in Temporal**  
9 **Scale in Hubei**

10 Nitrogen Dioxide- $R_0$  Temporal Correlation in 11 Hubei Cities. The 11 Hubei cities except  
11 Xianning all held significant positive correlations ( $r>0.51$ ,  $p<0.005$ ) between  $NO_2$  (with 12-  
12 day time lag) and daily  $R_0$  (normalized based on Wuhan's daily  $R_0$ ).

13

14

15

16

**Supplementary Material**

17

**Data collection**

18

We collected COVID-19 confirmed case information in China reported by

1 the National Health Commission and the Provincial Health Commissions of  
2 China. We calculated basic reproduction number ( $R_0$ ) for 63 cities with more  
3 than 50 cases as of February 10 (including 12 cities in Hubei and 51 cities  
4 outside Hubei).

5 Hourly  $\text{NO}_2$  data were obtained from the National Urban Air Quality  
6 Publishing Platform (<http://106.37.208.233:20035/>), which is administered by  
7 China's Ministry of Environmental Protection. Daily concentrations of  $\text{NO}_2$   
8 were calculated as the average of at least 18 (75%) hourly concentrations for all  
9 state-controlled stations, then daily  $\text{NO}_2$  levels of the city was averaged from all  
10 valid stations within it. Other meteorological data including daily mean  
11 temperature and relative humidity were collected from the China  
12 Meteorological Data Sharing Service System.

### 13 **Data analysis**

14 We conducted a cross-sectional analysis to examine the spatial associations  
15 of  $\text{NO}_2$  with  $R_0$  of COVID-19, and examined the temporal day-by-day  
16 associations of  $\text{NO}_2$  with  $R_0$  in cities of Hubei province since they had enough  
17 confirmed case number to acquire stable daily  $R_0$  and the other covariates  
18 including health policies were quite similar inside Hubei. We used multiple  
19 linear regression to assess the relationship between the spread ability of  
20 COVID-19 and nitrogen dioxide pollution across different cities. The basic  
21 reproduction number, denoted  $R_0$ , means the expected number of secondary

- 1 cases produced by an initial infectious individual, in a completely susceptible
- 2 population. if  $R_0 < 1$ , then the disease free equilibrium is locally asymptotically
- 3 stable; whereas if  $R_0 > 1$ , then it is unstable. Thus,  $R_0$  is a threshold parameter.
- 4 The calculation process is completed by R software.

## 5 **Spatial distribution of NO<sub>2</sub>**

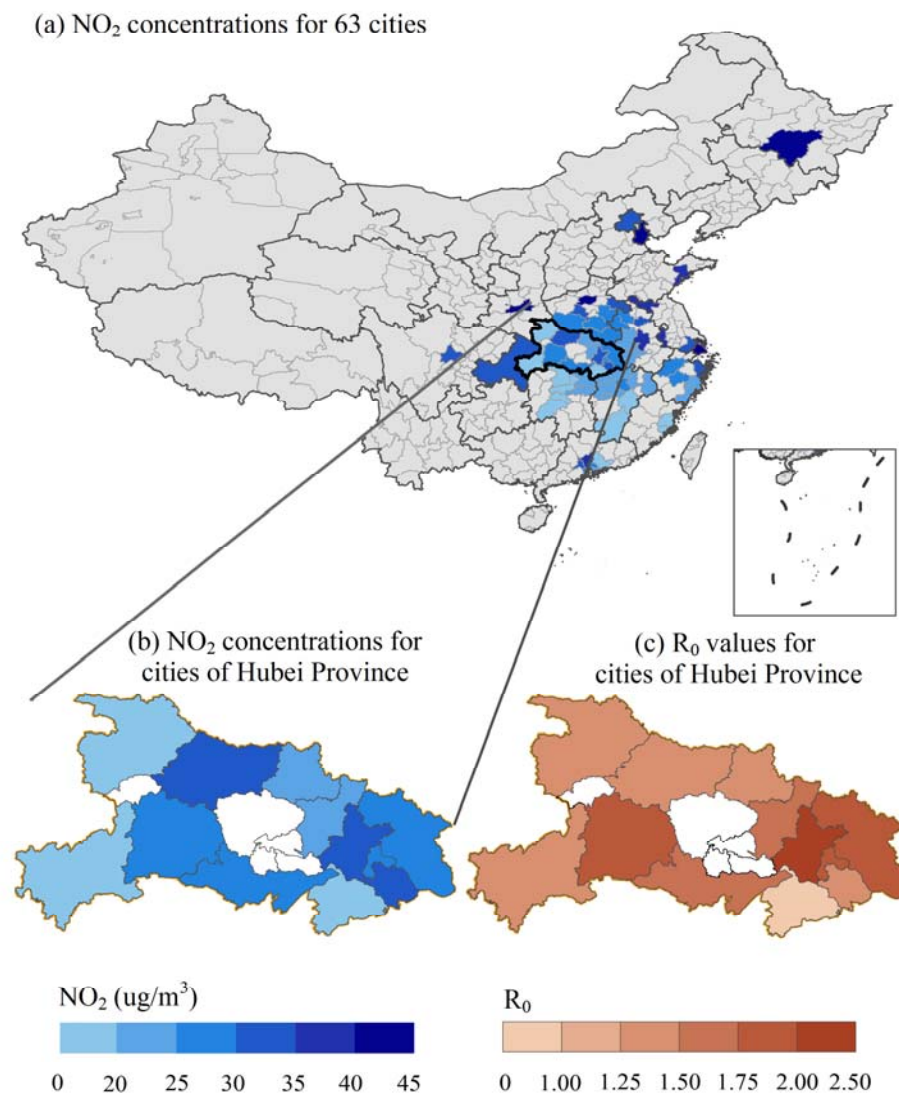

6

7 **Suppl.Figure1. The spatial Distribution of Average of Nitrogen Dioxide**  
8 **Concentration and Spread Ability of COVID-19.**

1 The China map shows the spatial distribution of the average nitrogen dioxide concentration  
2 from January 1, 2020, to February 8, 2020, in 63 Chinese cities. And zoom up the "Hubei  
3 province" part to compare the trend of the average nitrogen dioxide concentration (gradient  
4 blue map, bottom left) with the spatial trend of the basic reproduction number  $R_0$  (gradient  
5 brown map, bottom right) in Hubei province.

6
